# Supplementary material for: Two-Photon Imaging of Cortical Surface Microvessels Reveals a Robust Redistribution in Blood Flow after Vascular Occlusion
Source: PLOS journal article supplement (doi:10.1371/journal.pbio.0040022), 2005-12-27
Supplement: S7 (10.1371/journal.pbio.0040022.s007) [file journal.pbio.0040022.s007]

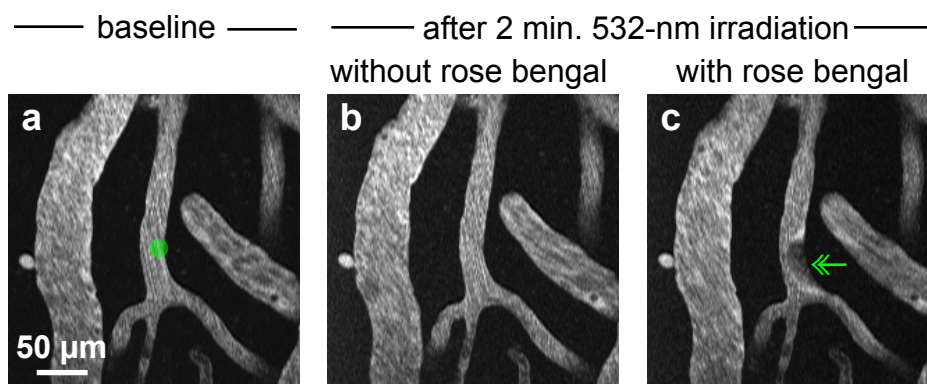

**Supplementary Figure 7. Control experiment showing that photothrombotic clot formation requires both rose bengal and green laser irradiation. (a)** Baseline TPLSM image of same vessel shown in figure 2. The green circle indicates the region that will be irradiated with 532-nm light. **(b)** After 2 min. irradiation with 0.5 mW of 532-nm laser light before intravenous injection of rose bengal. No clot formation is evident. **(c)** After an additional 2 min. irradiation after intravenous injection of rose bengal. Forming clot indicated by green arrow.
